# Supplementary material for: Female mice may have exacerbated catabolic signalling response compared to male mice during development and progression of disuse atrophy
Source: PubMed Central journal article supplement (PMC8200438; doi:10.1002/jcsm.12693), 2021-03-05

**A****Tissue Weights Normalized to Body Weight at Time of Unloading-Males**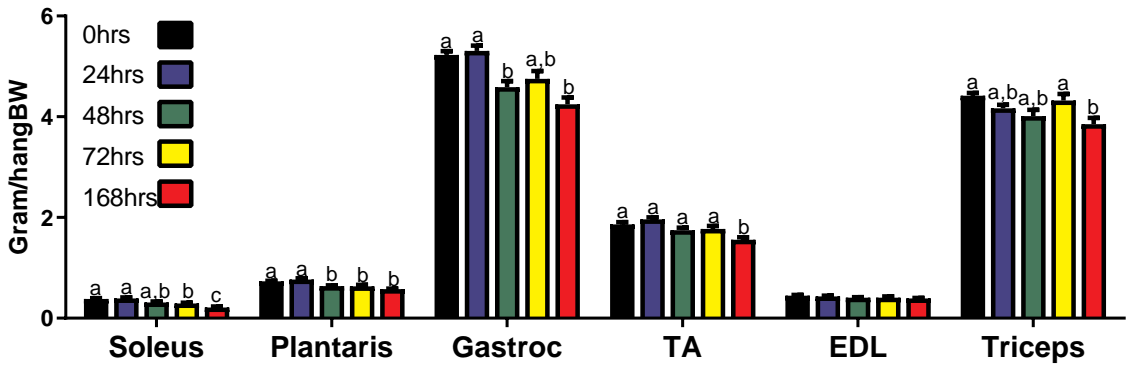**B****Tissue Weights Normalized to Body Weight at Time of Unloading-Females**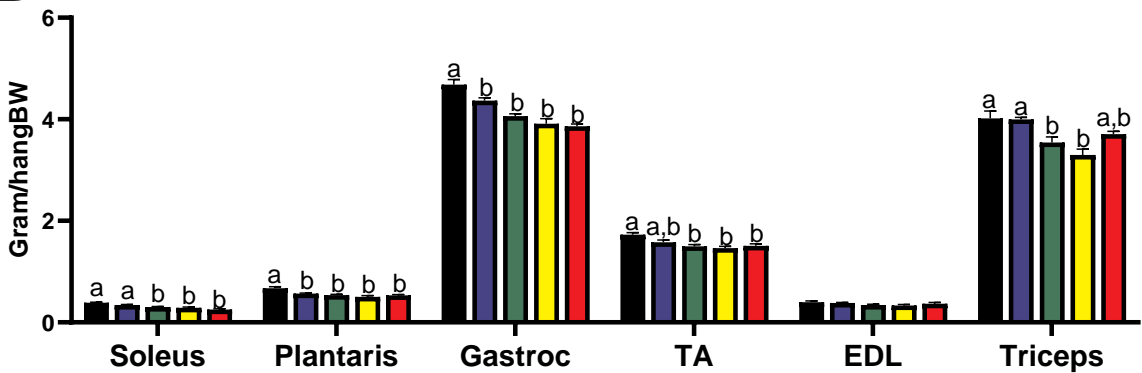**C****Percent Tissue Weight Lost-Males**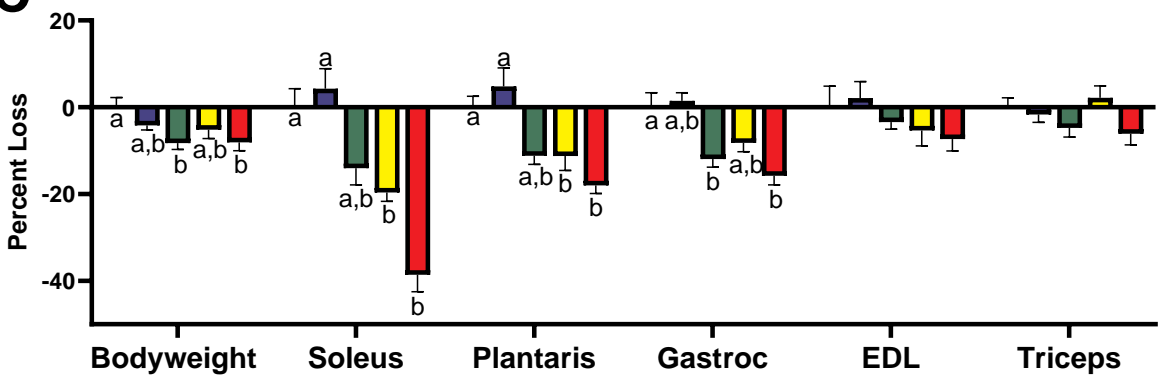**D****Percent Tissue Weight Lost-Females**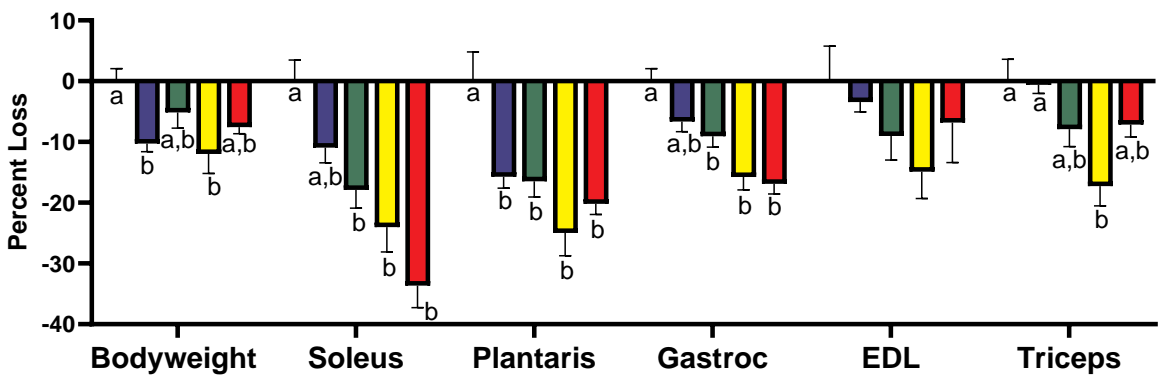

Supplement: JCSM-12-717-s001.pdf [file JCSM-12-717-s001.pdf]
