# Supplementary material for: Female mice may have exacerbated catabolic signalling response compared to male mice during development and progression of disuse atrophy
Source: PubMed Central journal article supplement (PMC8200438; doi:10.1002/jcsm.12693), 2021-03-05

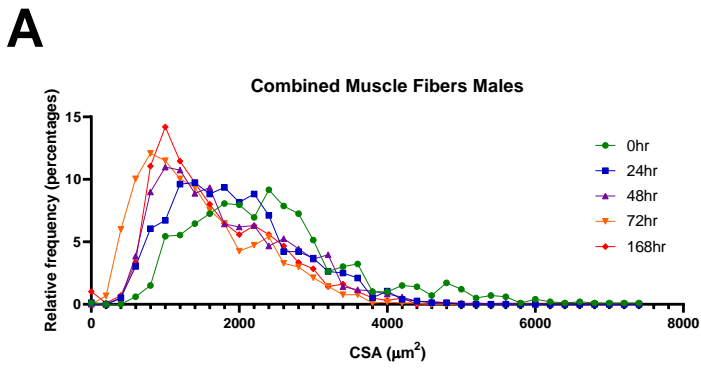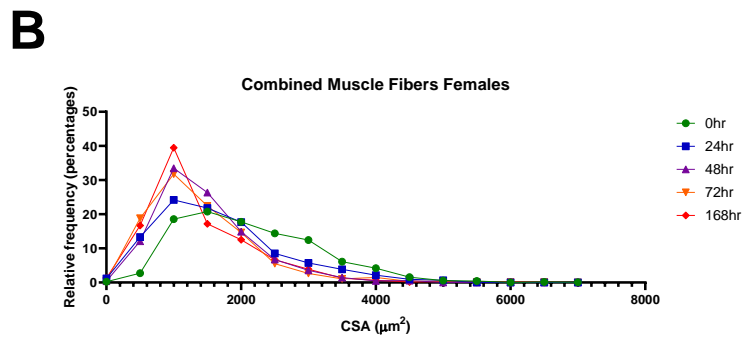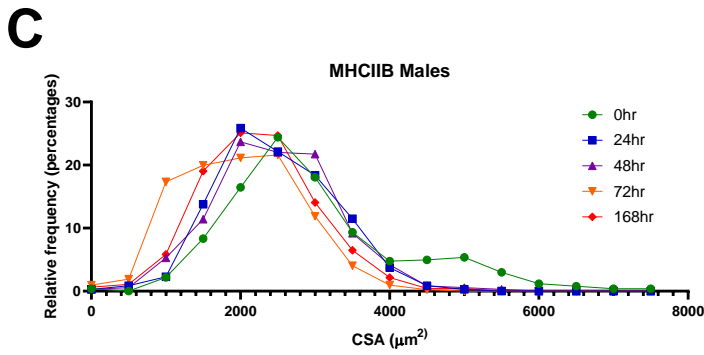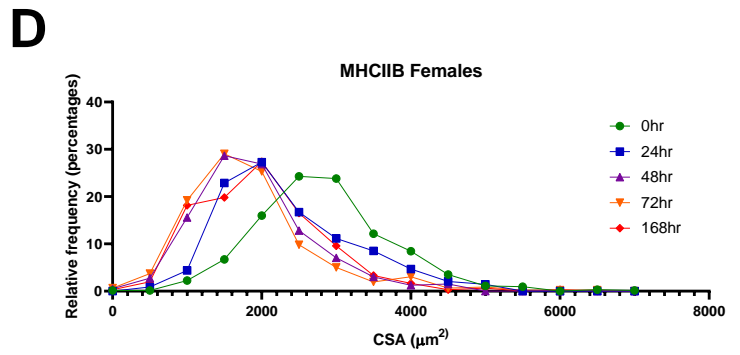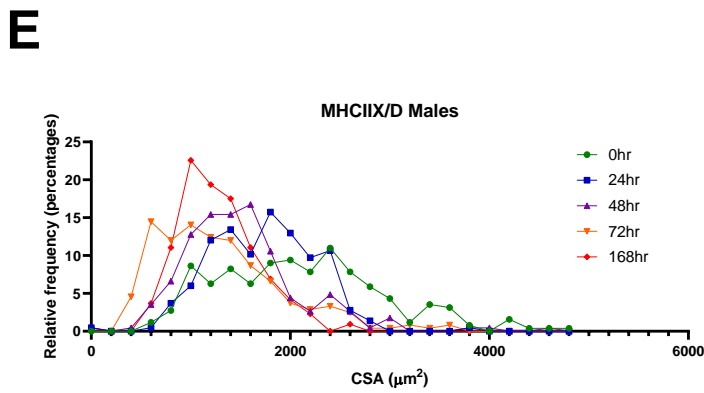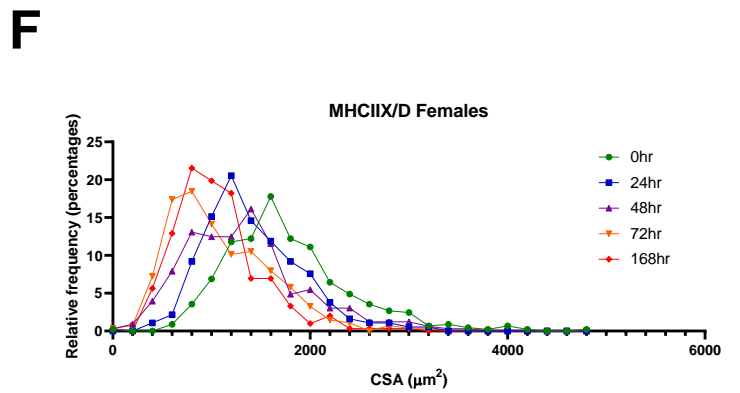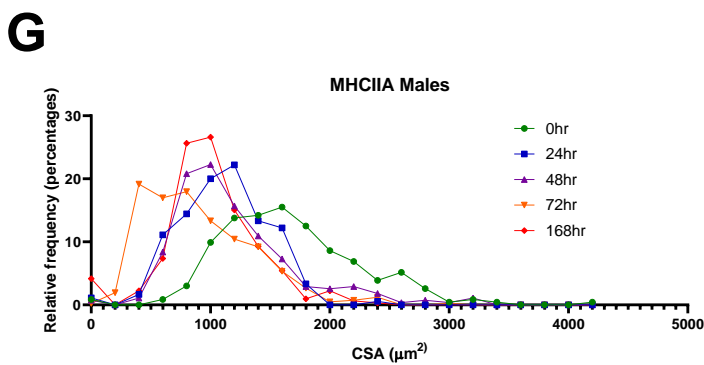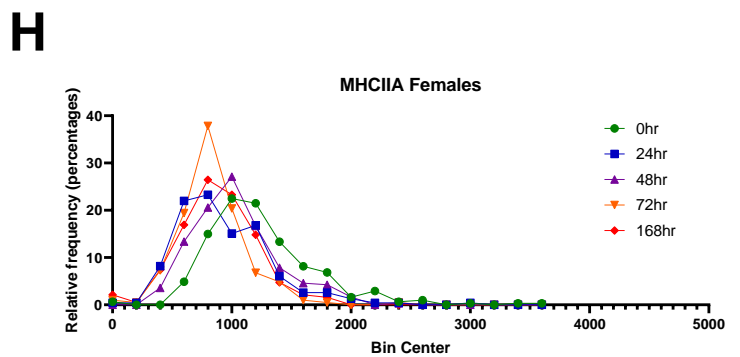

Supplement: JCSM-12-717-s004.pdf [file JCSM-12-717-s004.pdf]
